# Supplementary material for: Molecular Docking Simulations on Histone Deacetylases (HDAC)-1 and -2 to Investigate the Flavone Binding
Source: MDPI journal article supplement (doi:10.3390/biomedicines8120568), 2020-12-04
Supplement: s1 [file s1]

## Supplementary Materials

# Molecular docking simulations on histone deacetylases (HDAC)-1 and -2 to investigate the flavone binding

**Bernardina Scafuri <sup>1,†</sup>, Paola Bontempo <sup>2,†</sup>, Lucia Altucci <sup>2</sup>, Luigi De Masi <sup>3,\*</sup> and Angelo Facchiano <sup>4,\*</sup>**

<sup>1</sup> Department of Chemistry and Biology "A. Zambelli", University of Salerno, Via Giovanni Paolo II, 132, 84084 Fisciano (Salerno), Italy; bscafuri@unisa.it

<sup>2</sup> University of Campania "Luigi Vanvitelli", Department of Precision Medicine, via L. De Crecchio 7, 80138 Naples, Italy; paola.bontempo@unicampania.it and lucia.altucci@unicampania.it

<sup>3</sup> National Research Council (CNR), Institute of Biosciences and BioResources (IBBR), via Università 133, 80055 Portici (Naples), Italy; luigi.demasi@ibbr.cnr.it

<sup>4</sup> National Research Council (CNR), Institute of Food Science (ISA), via Roma 64, 83100 Avellino, Italy; angelo.facchiano@isa.cnr.it

† These authors contributed equally to this research work.

\* Correspondence: luigi.demasi@ibbr.cnr.it (L.D.M.) and angelo.facchiano@isa.cnr.it (A.F.)

Supplementary Tables

**Table S1**

**Autodock settings for simulations performed as blind (A) and focused (B) docking.**

All parameters not specified in this table or under Methods were left as default settings.

**A. Blind docking**

| Complex          | Docking protocol   | Grid box (npts) | Spacing (Å) |
|------------------|--------------------|-----------------|-------------|
| HDAC1-flavone    | rigid              | 106*112*126     | 0.513       |
| HDAC1-luteolin   | rigid              | 104*116*126     | 0.500       |
| HDAC1-apigenin   | rigid              | 118*124*126     | 0.480       |
| HDAC1-vorinostat | rigid              | 106*112*126     | 0.513       |
| HDAC2-flavone    | rigid              | 118*108*126     | 0.508       |
| HDAC2-luteolin   | rigid              | 118*108*126     | 0.508       |
| HDAC2-apigenin   | rigid and hydrated | 118*126*126     | 0.48        |
| HDAC2-vorinostat | rigid              | 118*114*126     | 0.48        |

**B. Focused docking**

| Complex          | Docking protocol   | Grid box (npts) | Spacing (Å) | Flexible residues                                       |
|------------------|--------------------|-----------------|-------------|---------------------------------------------------------|
| HDAC1-flavone    | flexible           | 48*60*55        | 0.375       | HIS140; HIS141; ASP176; ASP264; TYR303                  |
| HDAC1-luteolin   | flexible           | 48*60*55        | 0.375       | HIS140; HIS141; PHE150; ASP176; PHE 205; ASP264; TYR303 |
| HDAC1-apigenin   | flexible           | 48*60*55        | 0.375       | HIS140; HIS141; ASP176; PHE205; ASP264; TYR30           |
| HDAC1-vorinostat | rigid and hydrated | 48*60*55        | 0.375       |                                                         |
| HDAC2-flavone    | Rigid              | 48*60*48        | 0.375       |                                                         |
| HDAC2-apigenin   | flexible           | 50*60*48        | 0.375       | HIS145; HIS146; ASP181; PHE 210; ASP269; TYR308         |
| HDAC2-luteolin   | flexible           | 50*60*48        | 0.375       | HIS145; HIS146; ASP181; PHE 210; ASP269; TYR308         |
| HDAC2-vorinostat | Rigid              | 50*60*48        | 0.375       |                                                         |

**Table S2****Analysis of the best complex conformations.**

For each complex, the best cluster of conformations has been considered, and the best three energy values have been considered.

| Complex          | Number of<br>conformation<br>in the cluster | 1st<br>conf.       | 2nd<br>conf. | 3rd<br>conf. | Mean energy | Dev.std           |
|------------------|---------------------------------------------|--------------------|--------------|--------------|-------------|-------------------|
| HDAC1-flavone    | 15                                          | -10.29             | -10.23       | -9.86        | -10.13      | 0.23              |
| HDAC1-luteolin   | 9                                           | -9.41              | -9.26        | -8.87        | -9.18       | 0.28              |
| HDAC1-apigenina  | 12                                          | -9.25              | -8.34        | -7.73        | -8.44       | 0.76              |
| HDAC1-vorinostat | 40                                          | -8.46              | -8.38        | -8.21        | -8.35       | 0.13              |
| HDAC2-flavone    | 51                                          | -8.90              | -8.90        | -8.90        | -8.90       | 0.00 <sup>1</sup> |
| HDAC2-luteolin   | 6                                           | -9.26              | -9.13        | -9.02        | -9.14       | 0.12              |
| HDAC2-apigenin   | 1                                           | -9.32 <sup>2</sup> |              |              | -9.32       |                   |
| HDAC2-vorinostat | 63                                          | -8.50              | -8.36        | -8.31        | -8.39       | 0.10              |

<sup>1</sup> Standard deviation value obtained for HDAC2-flavone complex is equal to zero as a consequence of the same energy value observed for the first three conformations.

<sup>2</sup> For HDAC2-luteolin docking simulation, the best conformation obtained has not been clustered with other complex conformations.

**Table S3****Summary of interactions occurring for each tested ligand with HDAC1 and HDAC2.**

| HDACs: residue          | Interaction with |            |          |          |
|-------------------------|------------------|------------|----------|----------|
|                         | flavone          | vorinostat | apigenin | luteolin |
| HDAC1: Zn <sup>2+</sup> | X                | X          | X        | X        |
| HDAC2: Zn <sup>2+</sup> | X                | X          | X        | X        |
| HDAC1: TYR24            |                  |            |          | X        |
| HDAC2: TYR29            |                  |            |          |          |
| HDAC1: HIS29            |                  |            |          |          |
| HDAC2: HIS33            |                  | X          |          |          |
| HDAC1: PRO29            |                  |            |          |          |
| HDAC2: PRO34            |                  | X          |          |          |
| HDAC1: MET30            | X                | X          | X        | X        |
| HDAC2: MET35            | X                |            |          |          |
| HDAC1: ASP99            |                  |            | X        | X        |
| HDAC2: ASP104           | X                | X          | X        | X        |
| HDAC1: GLY138           |                  | X          |          |          |
| HDAC2: GLY143           |                  |            | X        |          |
| HDAC1: LEU139           | X                | X          | X        | X        |
| HDAC2: LEU144           | X                |            | X        |          |
| HDAC1: HIS140           | X                | X          | X        | X        |
| HDAC2: HIS145           | X                | X          | X        | X        |
| HDAC1: HIS141           | X                | X          | X        | X        |
| HDAC2: HIS146           | X                | X          | X        | X        |
| HDAC1: GLY149           | X                | X          | X        | X        |
| HDAC2: GLY154           | X                | X          | X        | X        |
| HDAC1: PHE150           | X                | X          | X        | X        |
| HDAC2: PHE155           | X                | X          | X        | X        |
| HDAC1: CYS151           | X                | X          | X        | X        |
| HDAC2: CYS156           | X                |            | X        | X        |
| HDAC1: ASP176           | X                | X          | X        | X        |
| HDAC2: ASP181           | X                | X          | X        | X        |
| HDAC1: HIS178           | X                | X          | X        | X        |
| HDAC2: HIS183           | X                | X          | X        | X        |
| HDAC1: TYR204           |                  | X          |          |          |
| HDAC2: TYR209           |                  |            |          |          |
| HDAC1: PHE205           | X                | X          | X        | X        |
| HDAC2: PHE210           | X                | X          | X        | X        |
| HDAC1: PRO206           |                  |            |          |          |
| HDAC2: PRO211           |                  |            | X        | X        |
| HDAC1: GLN260           |                  |            | X        | X        |
| HDAC2: GLN265           | X                | X          | X        | X        |
| HDAC1: ASP264           |                  |            | X        |          |
| HDAC2: ASP269           |                  |            | X        | X        |

|               |   |   |   |   |
|---------------|---|---|---|---|
| HDAC1: LEU271 | X | X | X |   |
| HDAC2: LEU276 | X | X | X |   |
| HDAC1: GLY272 |   | X |   |   |
| HDAC2: GLY277 |   |   |   |   |
| HDAC1: GLY300 | X | X | X | X |
| HDAC2: GLY305 | X |   |   | X |
| HDAC1: GLY301 | X | X | X | X |
| HDAC2: GLY306 | X | X | X | X |
| HDAC1: GLY302 |   |   |   |   |
| HDAC2: GLY307 |   |   | X | X |
| HDAC1: TYR303 | X | X | X | X |
| HDAC2: TYR308 | X | X | X | X |

Supplementary Figures





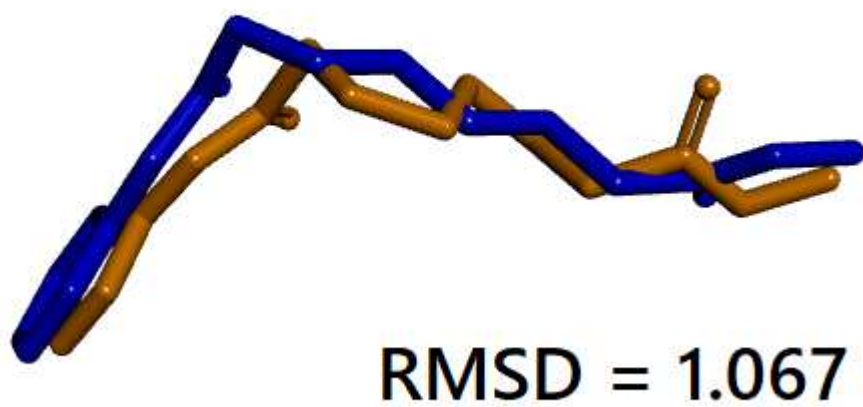

**Figure S2.** Superimposition of vorinostat molecules from the experimental complex and the redocked complex.

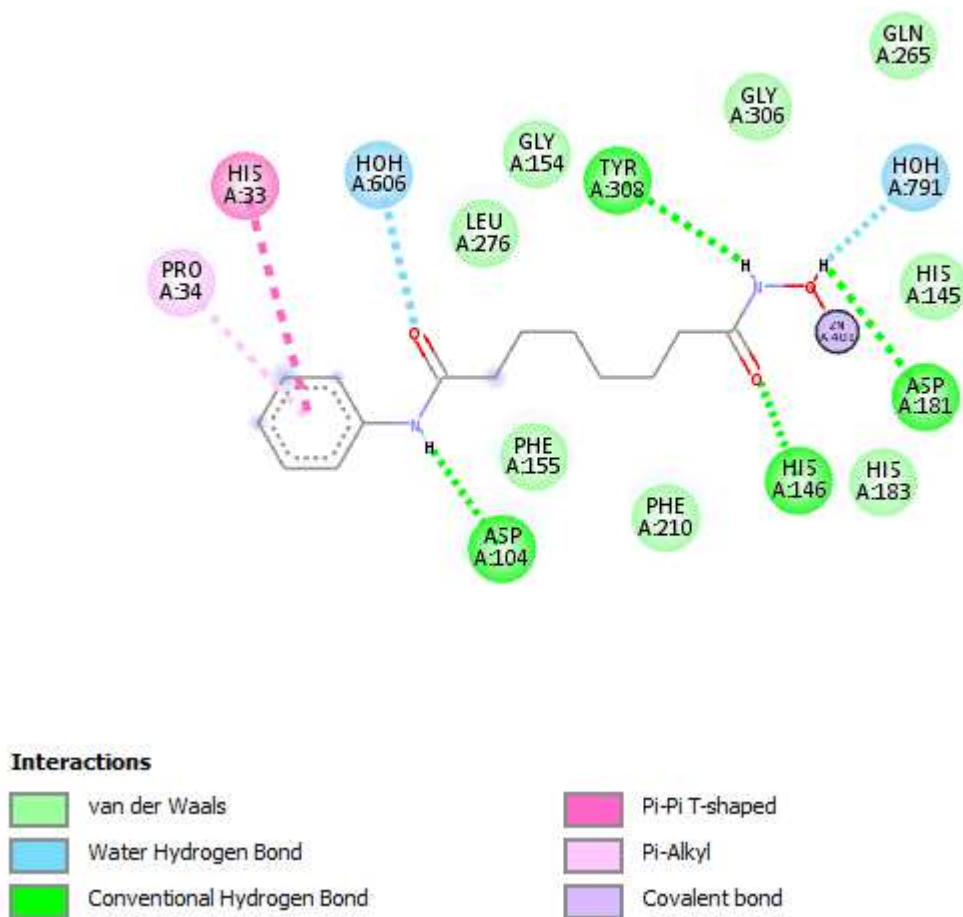

**Figure S3.** 2D diagram of interaction between HDAC2 and vorinostat. Image created with DiscoveryStudio4.5.

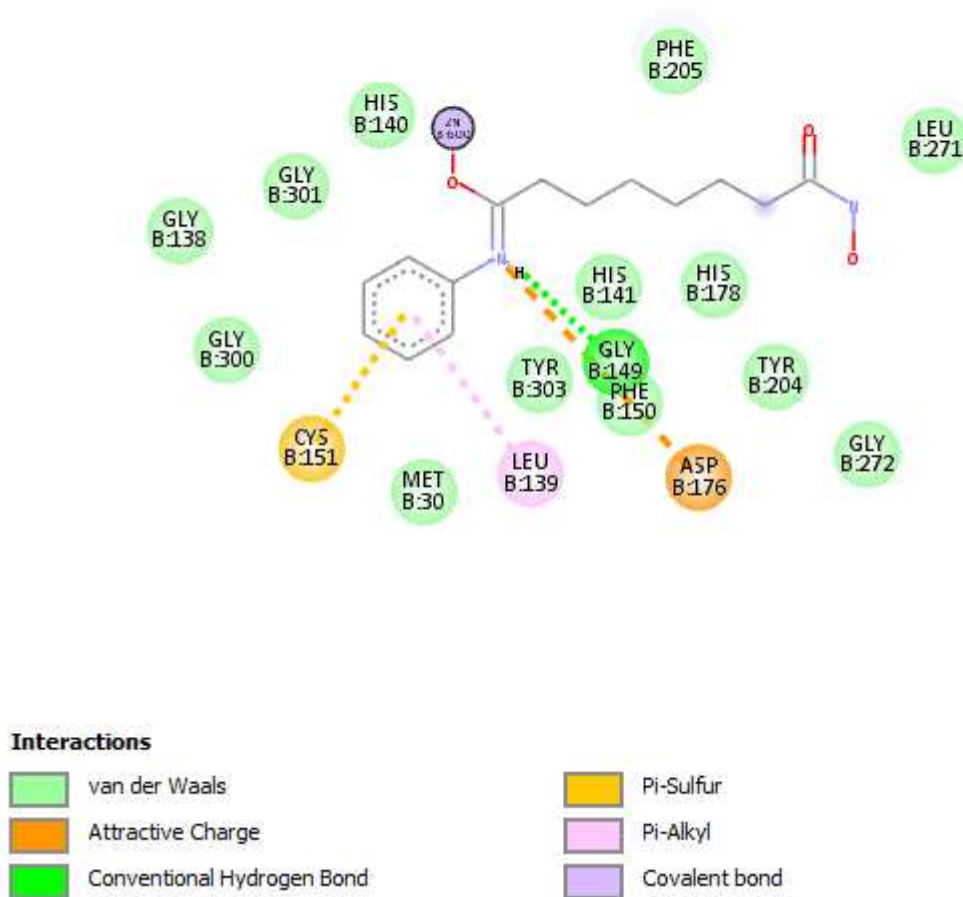

**Figure S4.** 2D diagram of interaction between HDAC1 and vorinostat. Image created with DiscoveryStudio4.5.

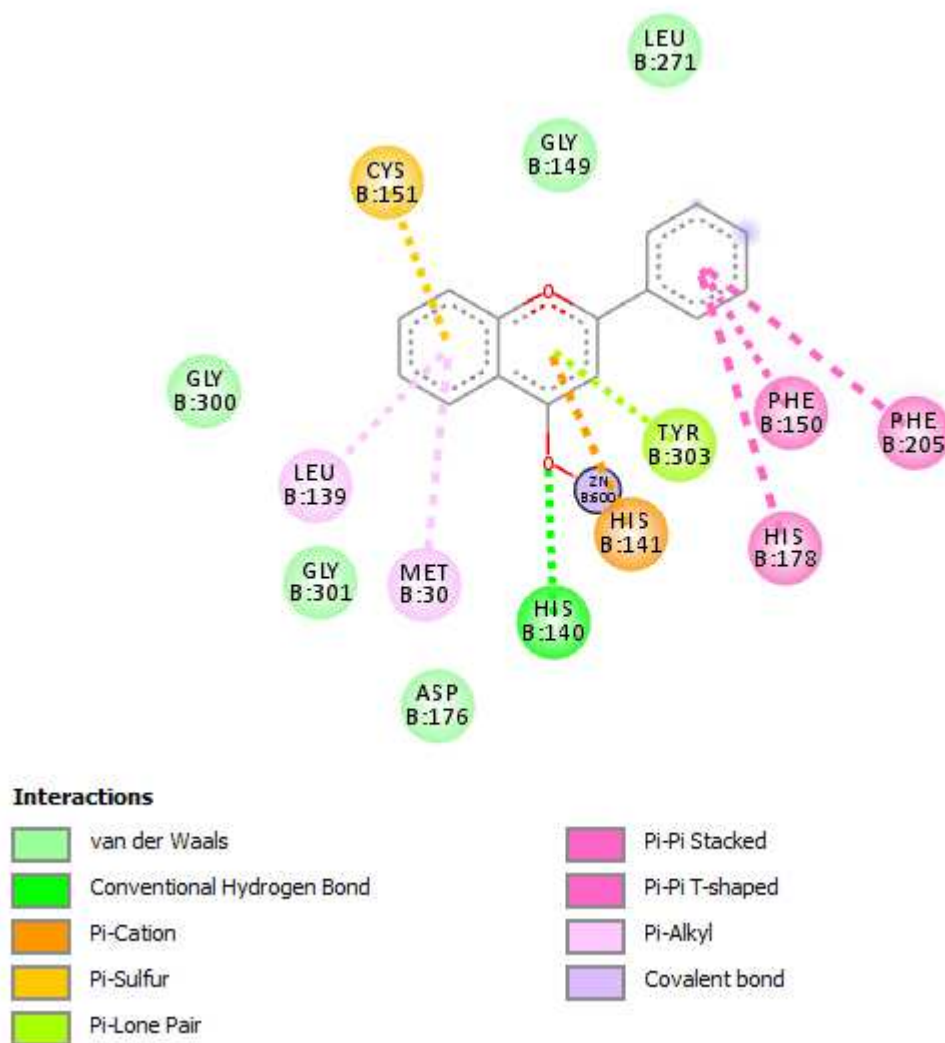

**Figure S5.** 2D diagram of interaction between HDAC1 and flavone. Image created with DiscoveryStudio4.5.

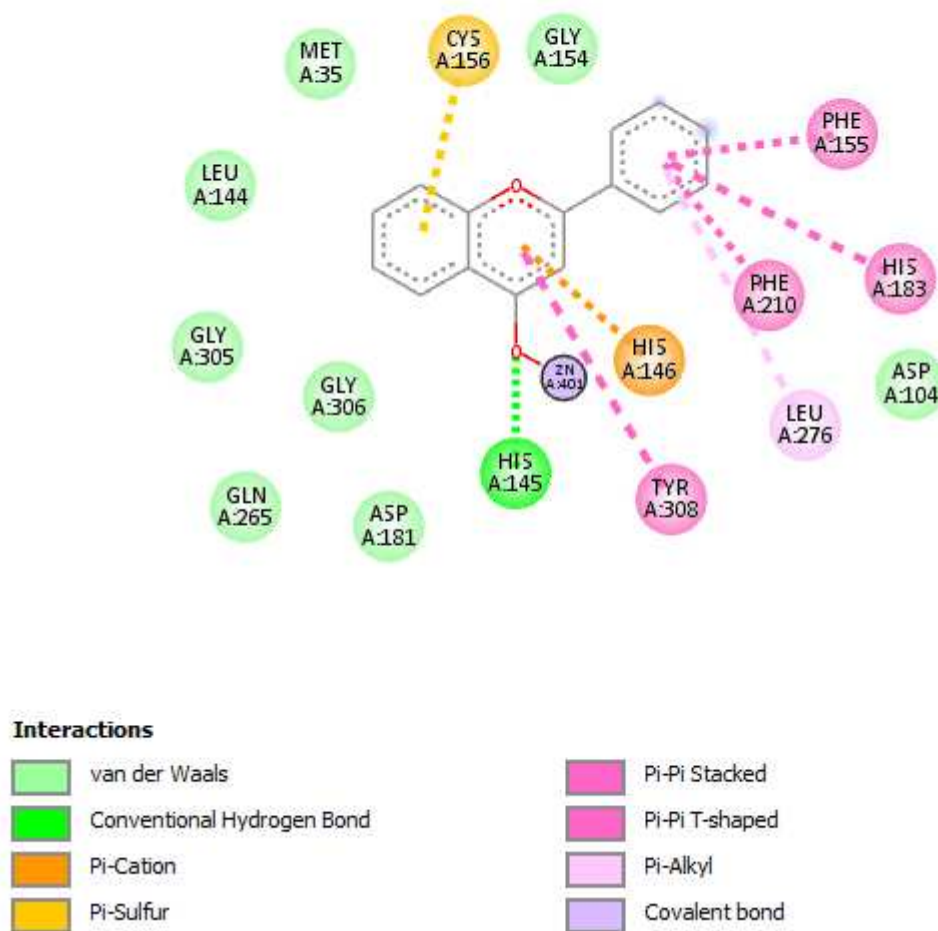

**Figure S6.** 2D diagram of interaction between HDAC2 and flavone. Image created with DiscoveryStudio4.5.

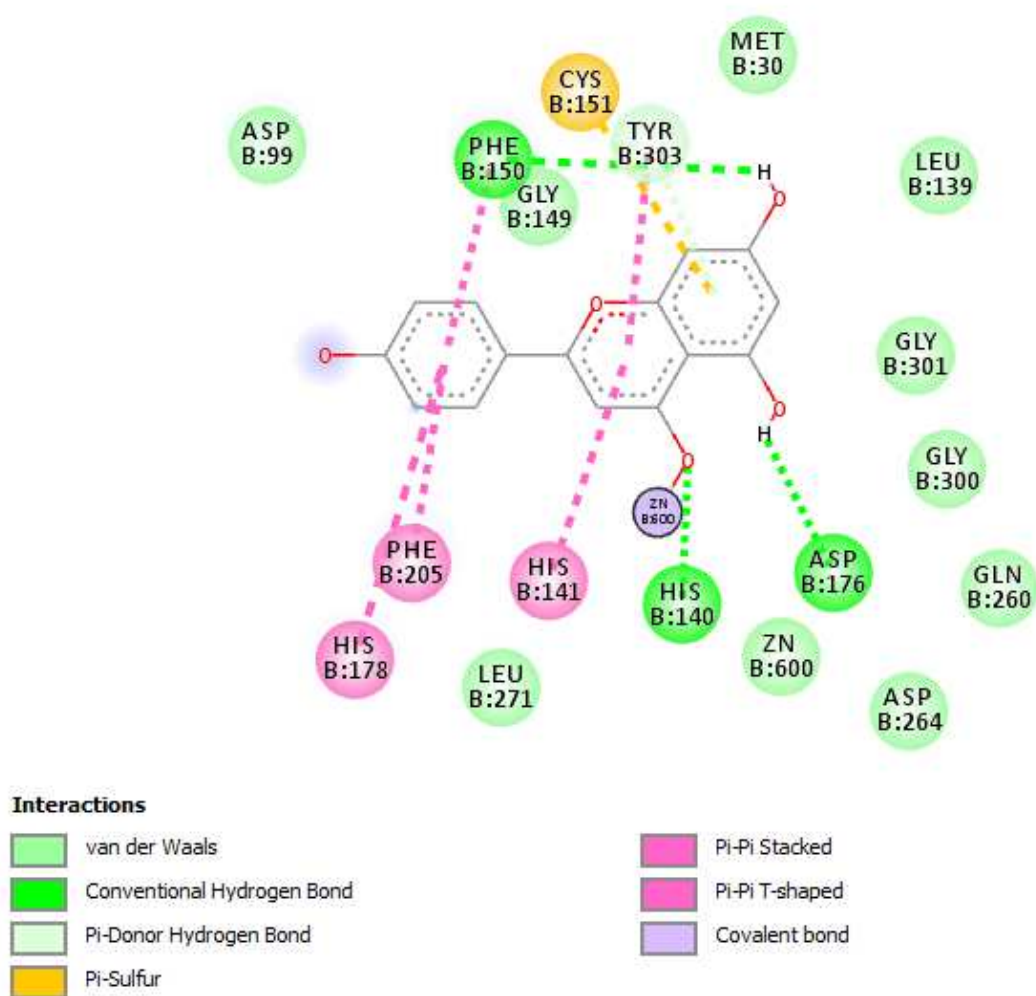

**Figure S7.** 2D diagram of interaction between HDAC1 and apigenin. Image created with DiscoveryStudio4.5.

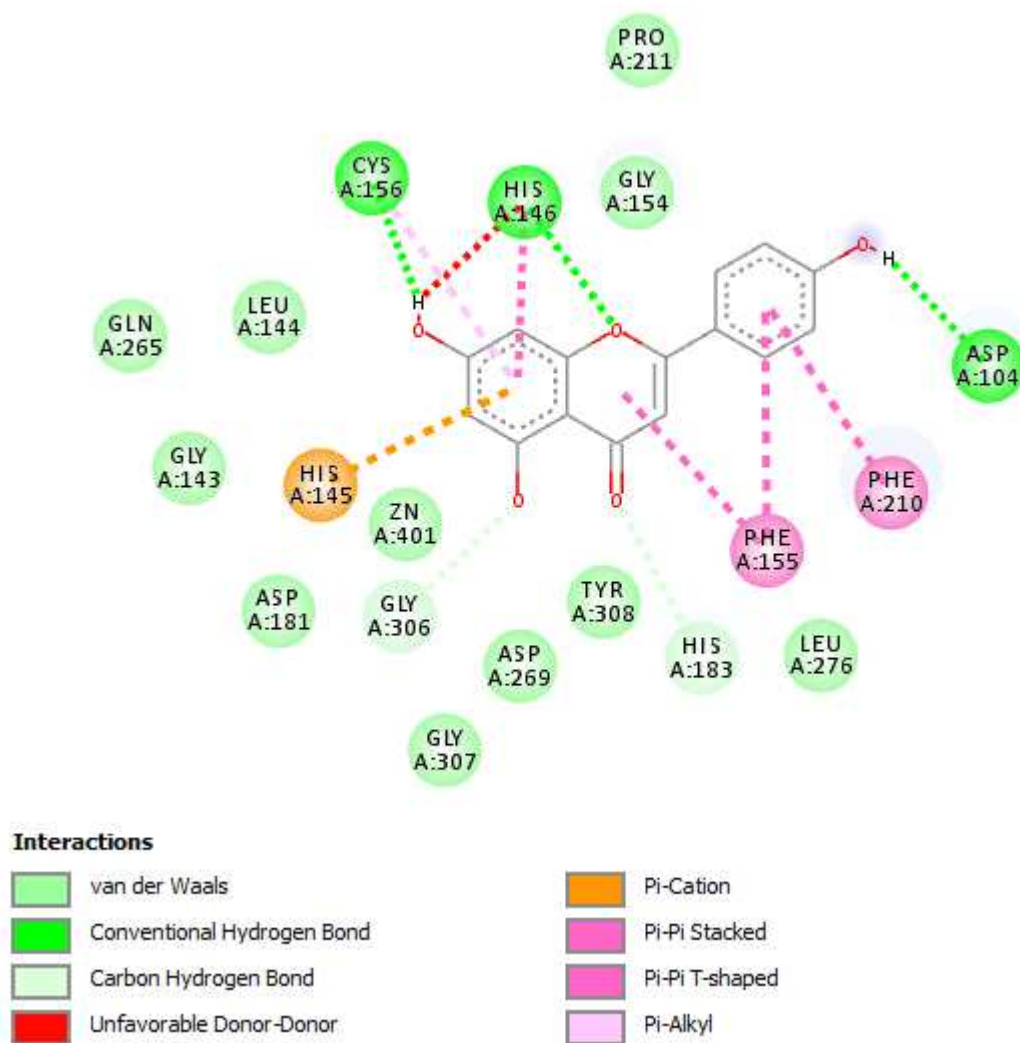

**Figure S8.** 2D diagram of interaction between HDAC2 and apigenin. Image created with DiscoveryStudio4.5.

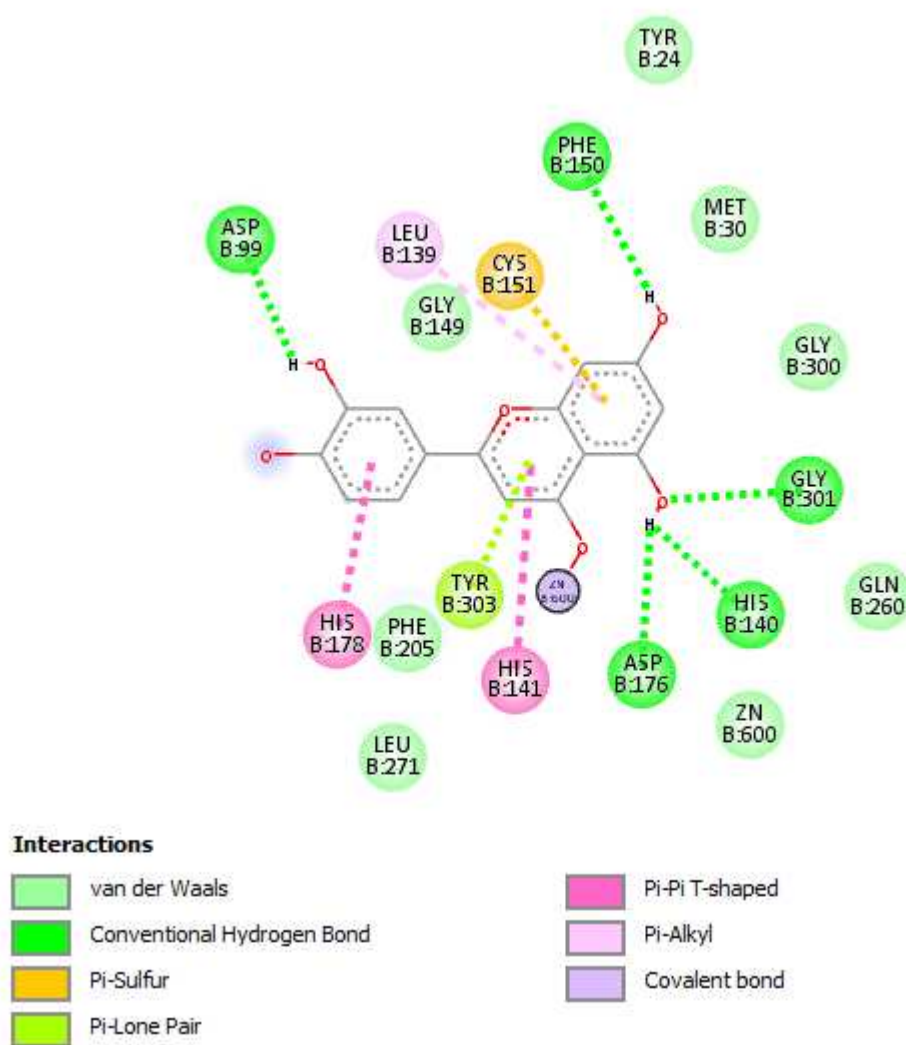

**Figure S9.** 2D diagram of interaction between HDAC1 and luteolin. Image created with DiscoveryStudio4.5.



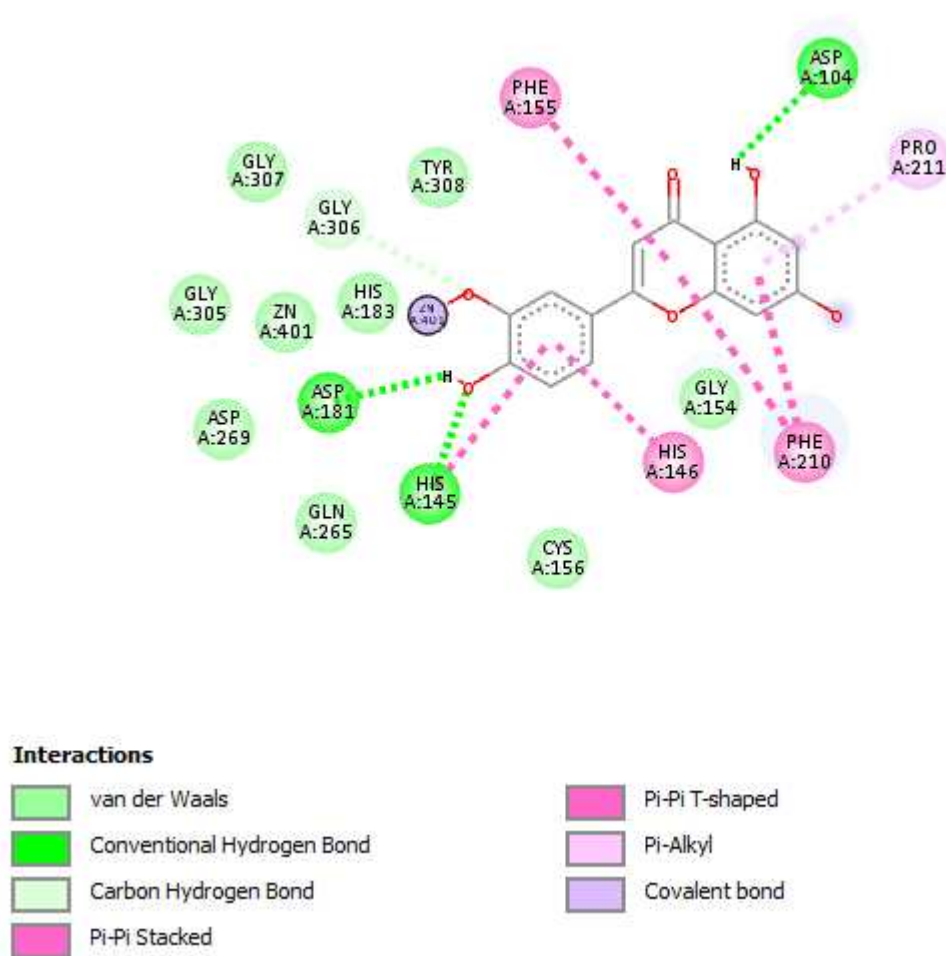

**Figure S10.** 2D diagram of interaction between HDAC2 and luteolin. Image created with DiscoveryStudio4.5.
